# Supplementary material for: Senescence-Associated Molecules and Tumor-Immune-Interactions as Prognostic Biomarkers in Colorectal Cancer
Source: PubMed Central journal article supplement (PMC9039237; doi:10.3389/fmed.2022.865230), 2022-04-12

# Supplementary Figure 1

## A

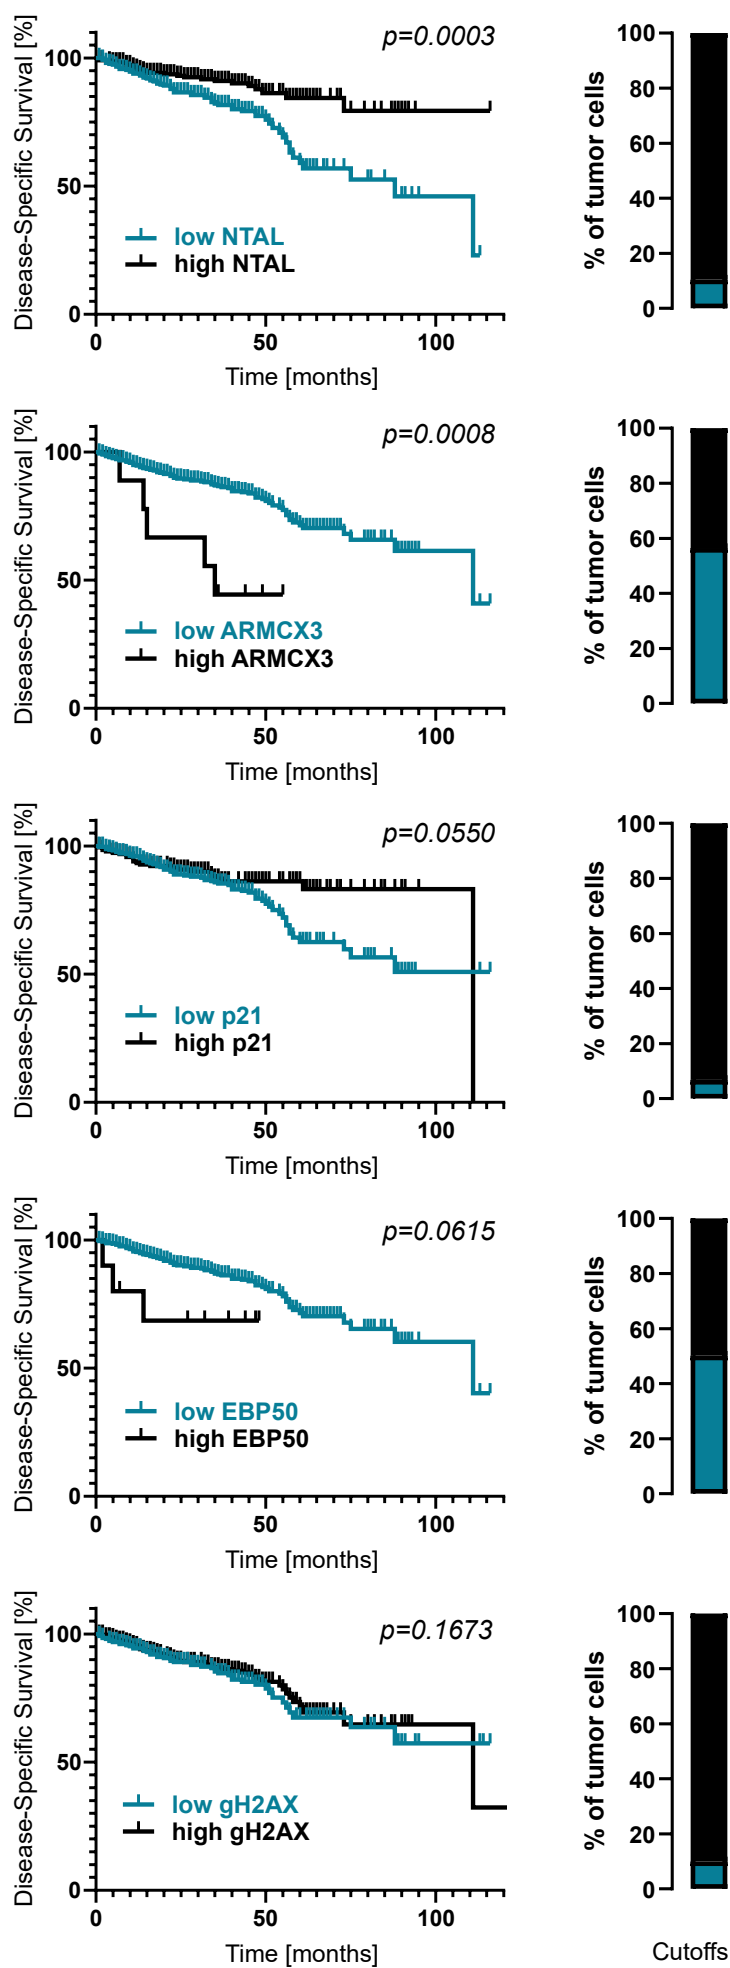

## B

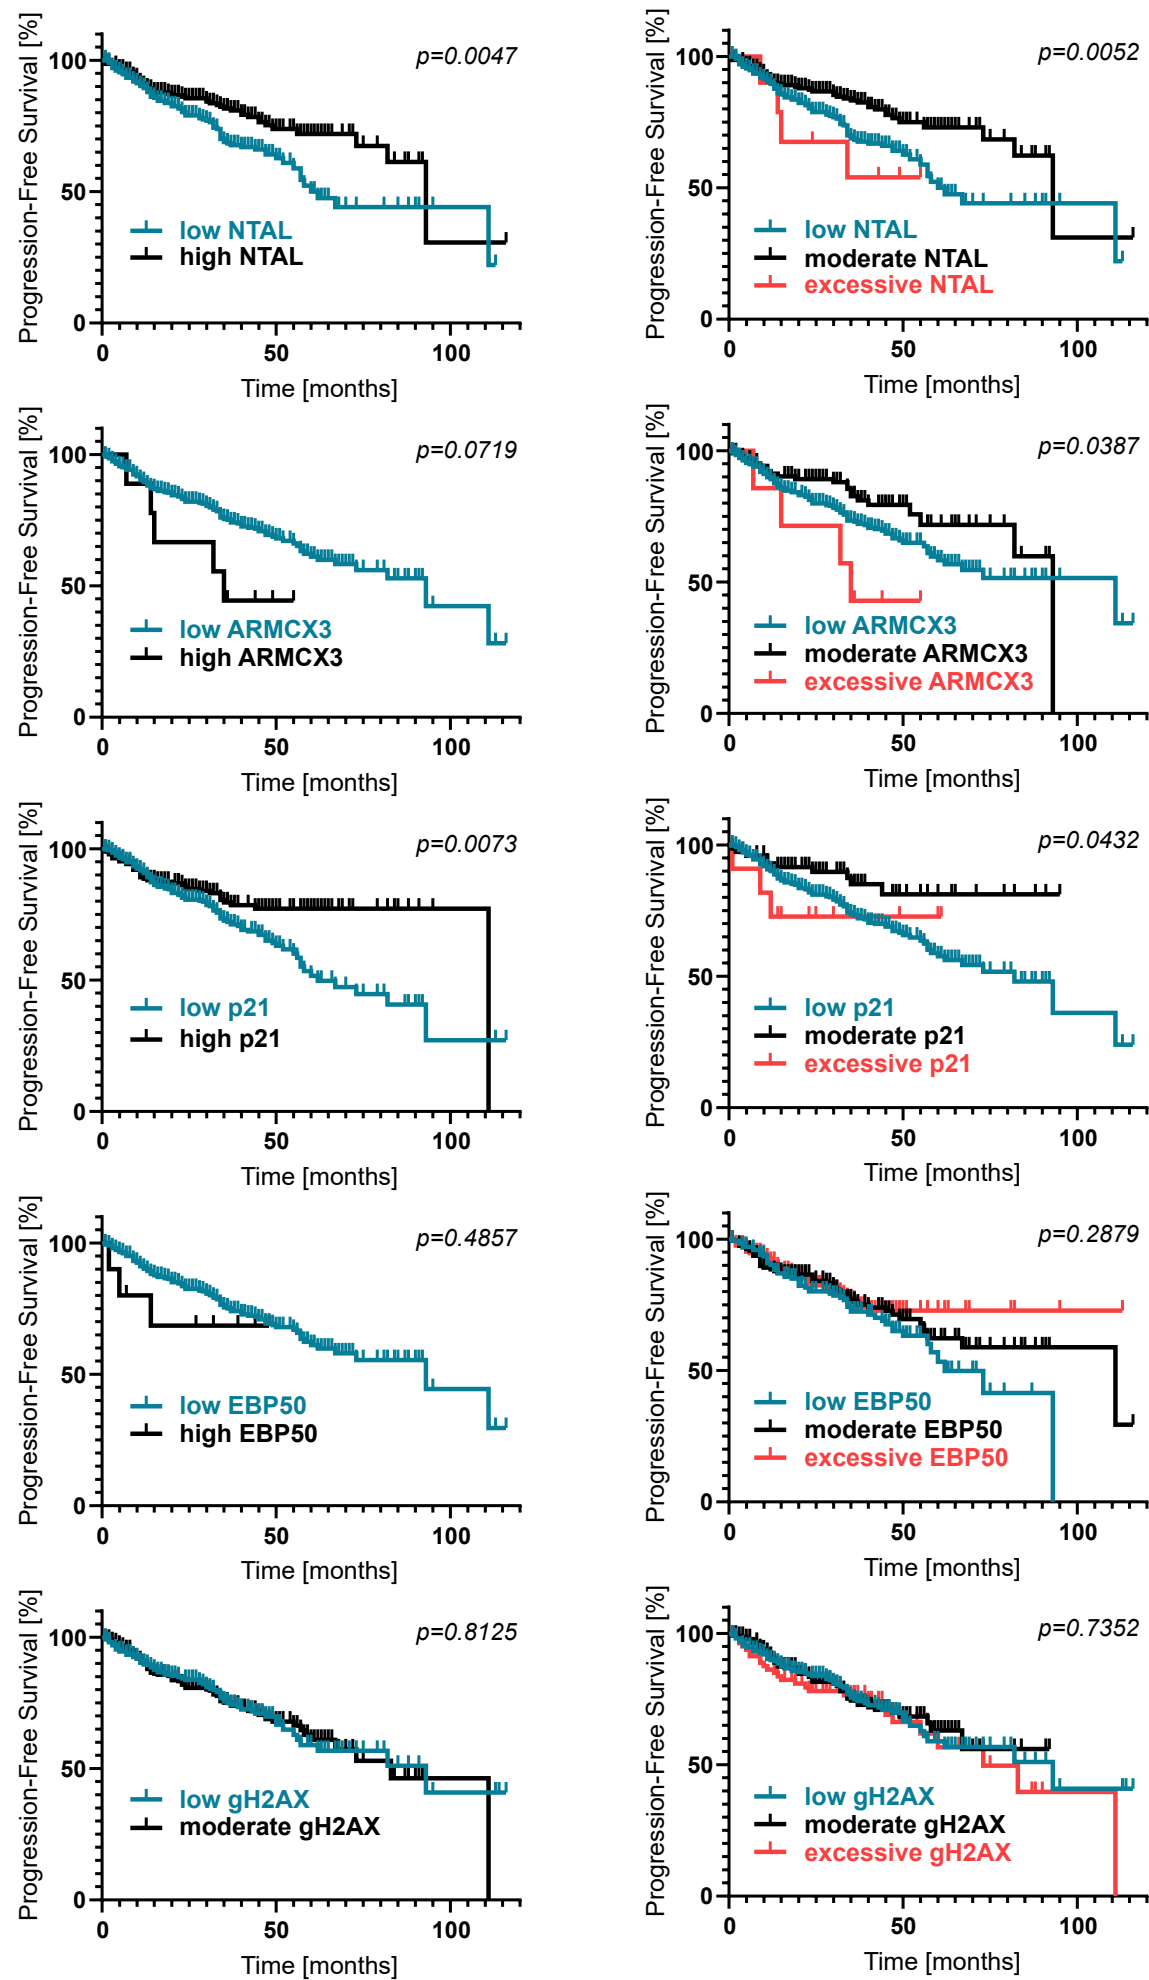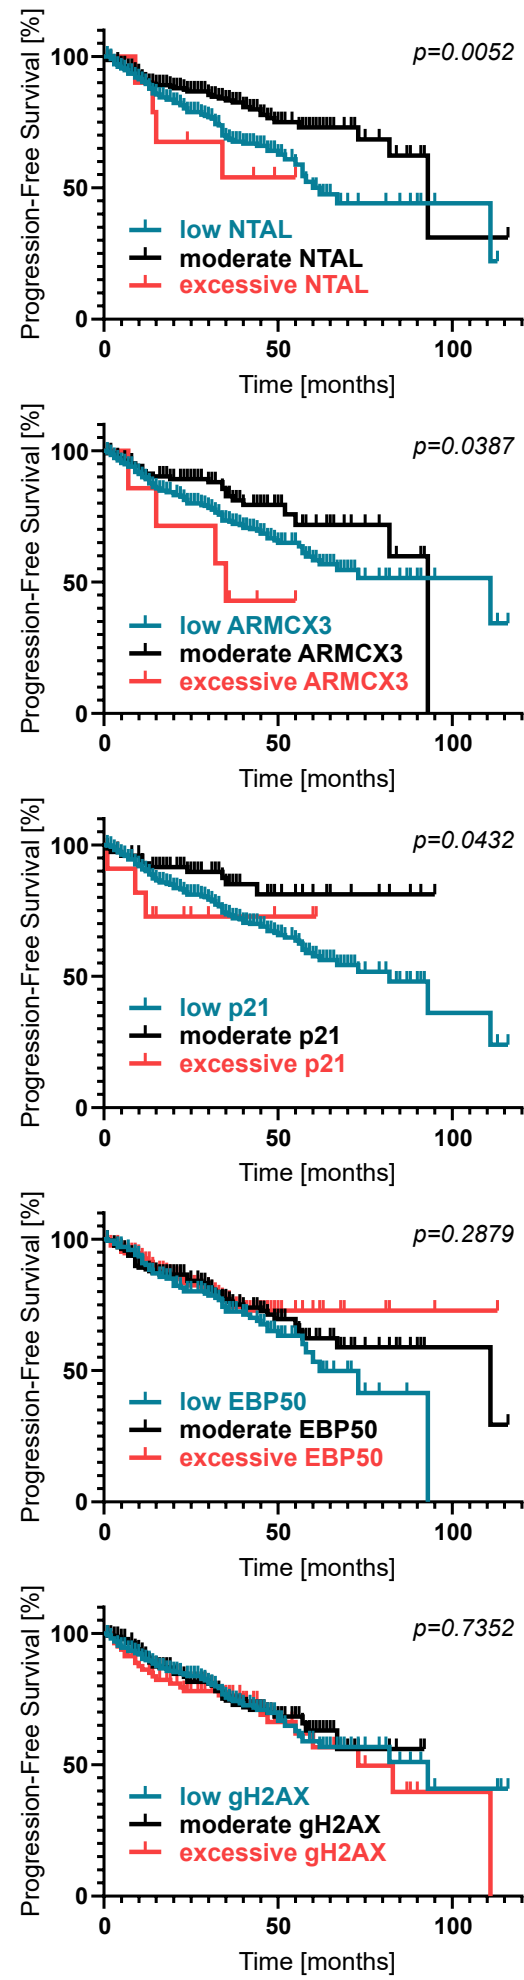

Supplement: Image_1.pdf [file Image_1.pdf]
