# Supplementary material for: Senescence-Associated Molecules and Tumor-Immune-Interactions as Prognostic Biomarkers in Colorectal Cancer
Source: PubMed Central journal article supplement (PMC9039237; doi:10.3389/fmed.2022.865230), 2022-04-12
Supplement: Table_1.pdf [file Table_1.pdf]

**Supplementary Table 1**

| Type                | Concentration | Vendor                  |
|---------------------|---------------|-------------------------|
| <i>Inhibitors</i>   |               |                         |
| Glycyrrhizinic acid | 200 $\mu$ M   | Selleckchem 1405-86-3   |
| Navitoclax ABT263   | 1,25 $\mu$ M  | Selleckchem 923564-51-6 |
| Spautin-1           | 10 $\mu$ M    | Sigma SML0440-5MG       |
| Concanamycin        | 50 $\mu$ M    | Selleckchem S7023       |
| Necrostatin-1       | 20 $\mu$ M    | Sigma N9037-10MG        |
| <i>Antibodies</i>   |               |                         |
| anti ARMCX3         | 1:200         | Abcam ab98938           |
| anti p21            | 1:50          | Dako Clone SX118        |
| anti EBP50          | 1:100         | Abcam ab109430          |
| anti NTAL           | 1:50          | Abcam ab3992            |
| anti gH2AX          | 1:150         | Cell Signaling #9718    |
