# Supplementary material for: Senescence-Associated Molecules and Tumor-Immune-Interactions as Prognostic Biomarkers in Colorectal Cancer
Source: PubMed Central journal article supplement (PMC9039237; doi:10.3389/fmed.2022.865230), 2022-04-12
Supplement: Table_2.pdf [file Table_2.pdf]

## Supplementary Table 2

|             |      |
|-------------|------|
| N =         | 598  |
| Sex         |      |
| male        | 323  |
| female      | 275  |
| Age (years) |      |
| average     | 70.3 |
| T-Stage     |      |
| T1          | 52   |
| T2          | 121  |
| T3          | 371  |
| T4          | 54   |
| N-Stage     |      |
| N0          | 345  |
| N1          | 153  |
| N2          | 88   |
| NX          | 12   |
| M-Stage     |      |
| M0          | 317  |
| M1          | 61   |
| MX          | 220  |
| UICC        |      |
| I           | 135  |
| II          | 210  |
| III         | 192  |
| IV          | 61   |
| Grading     |      |
| G1          | 7    |
| G2          | 429  |
| G3          | 162  |
