# Supplementary material for: Senescence-Associated Molecules and Tumor-Immune-Interactions as Prognostic Biomarkers in Colorectal Cancer
Source: PubMed Central journal article supplement (PMC9039237; doi:10.3389/fmed.2022.865230), 2022-04-12
Supplement: Table_3.pdf [file Table_3.pdf]

### Supplementary Table 3

| Marker | low       | high      | low    | moderate    | high   |
|--------|-----------|-----------|--------|-------------|--------|
| NTAL   | < 10.52   | > 10.52   | < 11   | 11 - 63     | > 63   |
| ARMCX3 | < 56.45   | > 56.45   | < 17.5 | 17.5 - 63   | > 63   |
| p21    | < 6.83    | > 6.83    | < 15   | 15 - 38     | > 38   |
| EBP50  | < 50.2131 | > 50.2131 | < 0.81 | 0.81 - 6.19 | > 6.19 |
| gH2AX  | < 10*     | > 10*     | < 2*   | 2 - 10*     | > 10*  |

\*positive cells per core

p21 | CD8

| average distance |          | CD8+ within 100 µm of p21+ |        |
|------------------|----------|----------------------------|--------|
| close            | far      | low                        | high   |
| < 145 µm         | > 145 µm | < 50 %                     | > 50 % |
